# Supplementary material for: Rational design of CNTs with encapsulated Co nanospheres as superior acid- and base-resistant microwave absorbers
Source: Royal Society of Chemistry journal article supplement (doi:10.1039/c8dt02037j), 2018-01-01
Supplement: c8dt02037j1.pdf [file c8dt02037j1.pdf]

## Supporting Information

# Rational Design of CNTs with Encapsulated Co Nanospheres as Superior Acidic-and-Basic-Resistant Microwave Absorber

*Chen Liang,<sup>a</sup> Ying Yu,<sup>a</sup> Cailing Chen,<sup>a</sup> Yue Lou,<sup>a</sup> Lei Wang,<sup>b</sup> Kang Liu,<sup>b</sup> Xiao-Bo Chen,<sup>a, c</sup>*

*Chunguang Li<sup>a, \*</sup> and Zhan Shi<sup>a, \*</sup>*

- a. State Key Laboratory of Inorganic Synthesis and Preparative Chemistry, Jilin University, Changchun 130012, People's Republic of China.
- b. Key Laboratory of Eco-chemical Engineering, Ministry of Education, Laboratory of Inorganic Synthesis and Applied Chemistry, College of Chemistry and Molecular Engineering, Qingdao University of Science and Technology, Qingdao 266042, China
- c. School of Engineering, RMIT University, Carlton 3053, VIC, Australia

*Corresponding author: Zhan Shi*

*E-mail addresses: zshi@mail.jlu.edu.cn*

*Tel: +86-85168624*

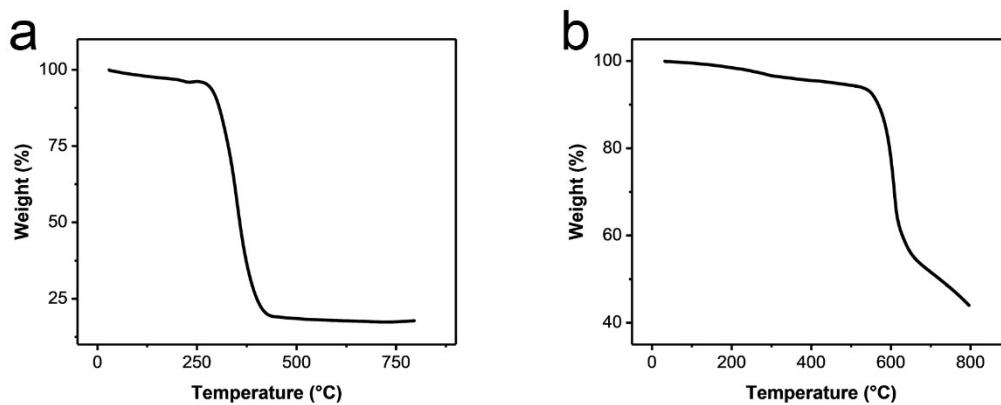

**Fig. S1** TG curves of Co@CNTs-500 under air (a) and ZIF-67 under nitrogen (b).

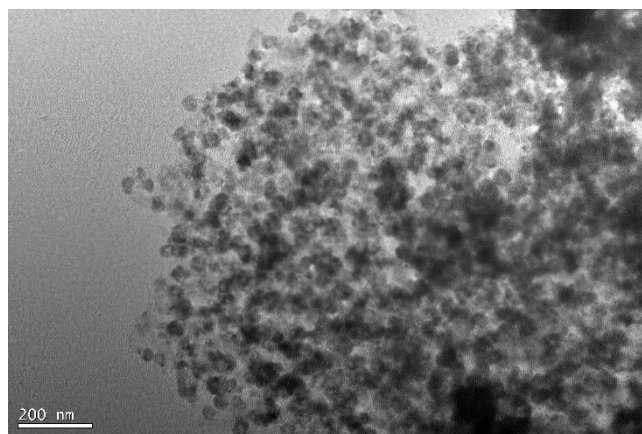

**Fig. S2** TEM image of Co@CNTs.

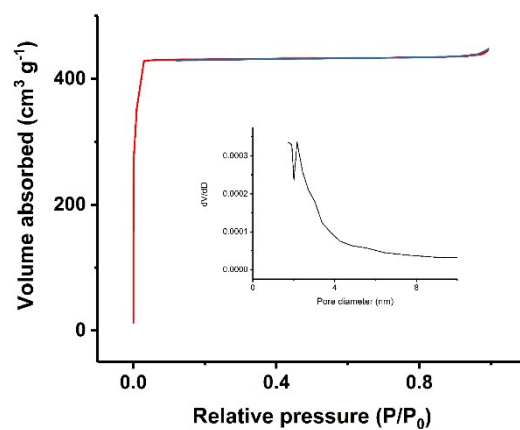

**Fig. S3** Nitrogen sorption isotherms and pore size distribution of nanoZIF-67.

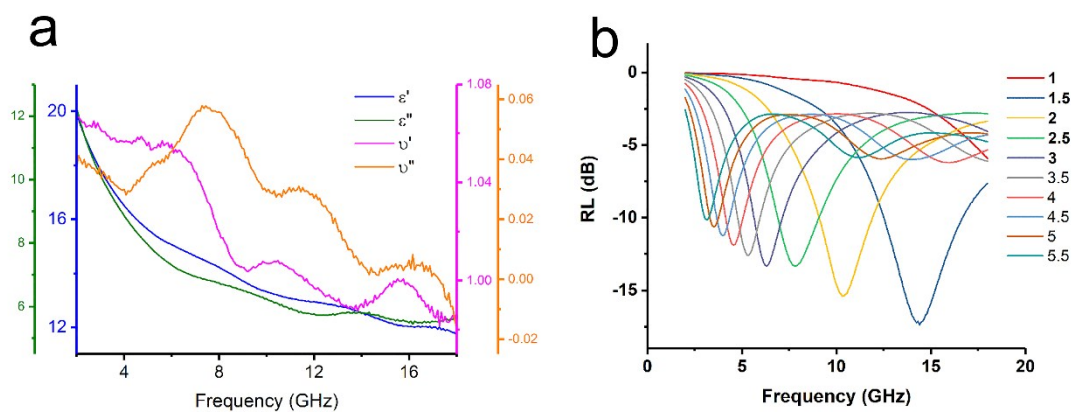

**Fig. S4** Co@CNTs-800 real and imaginary parts of complex permittivity and permeability (a), and microwave reflection losses (b).

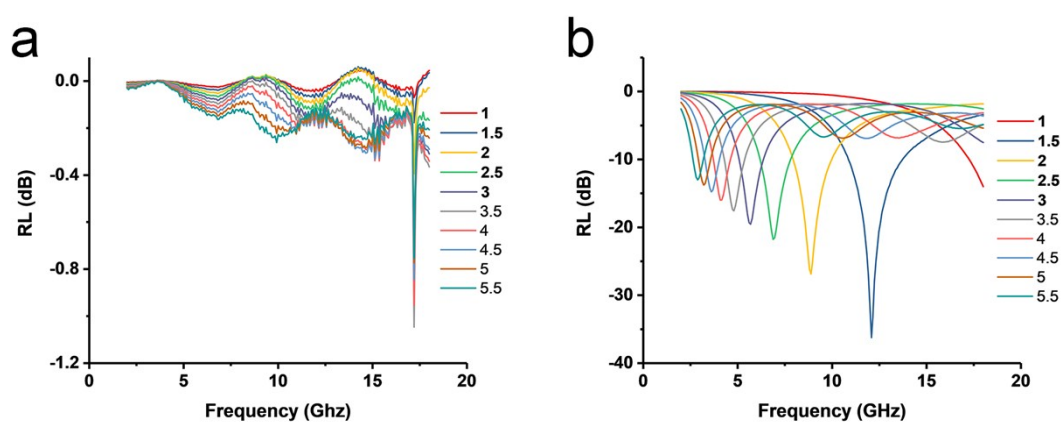

**Fig. S5** Microwave reflection losses of ZIF-67 (a) and commercial CNTs (b).

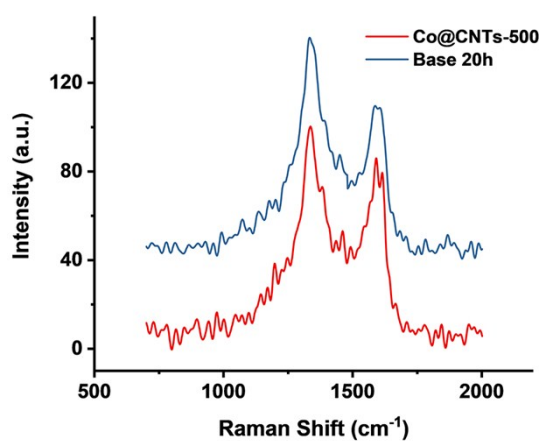

**Fig. S6** Raman spectra of Co@CNTs-500 (red) and after treated with 1 M ammonia 20 h (blue).

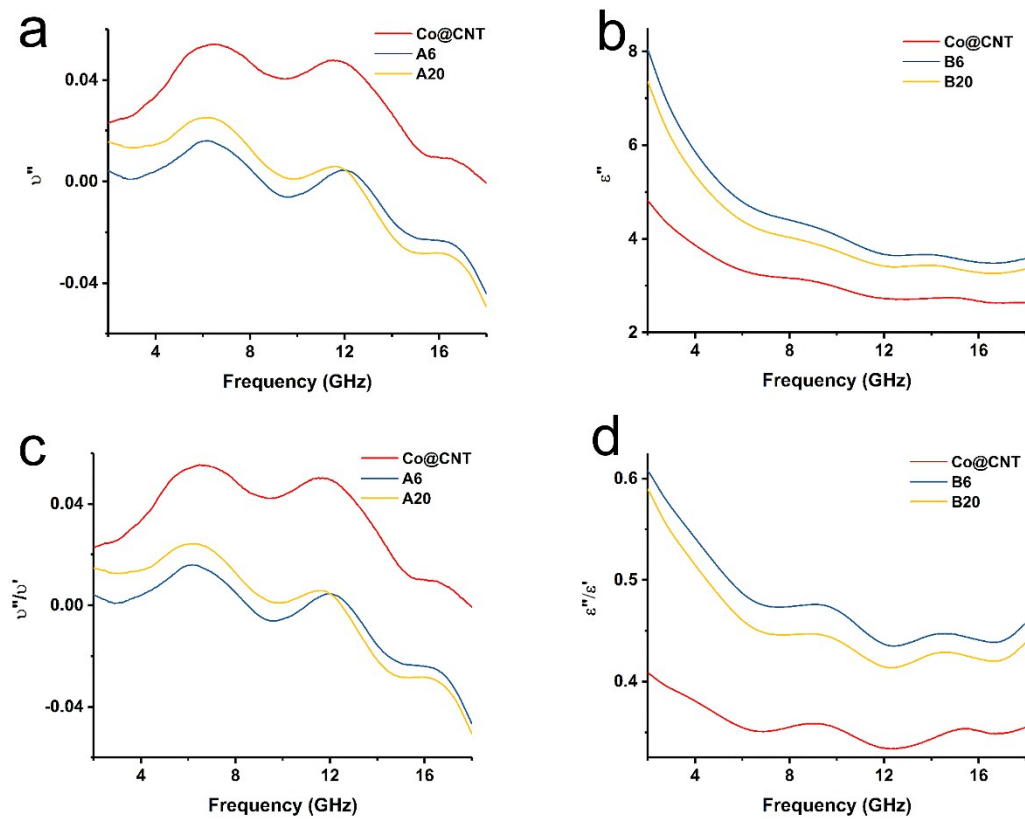

**Fig. S7** imaginary parts of permeability and magnetism loss tangents after treatment with 1 M  $\text{H}_2\text{SO}_4$  for 6 h and 20 h (a and c), imaginary parts of permittivity and dielectric loss tangent after treatment with 1 M  $\text{NH}_3\cdot\text{H}_2\text{O}$  for 6 h and 20 h (b and d).

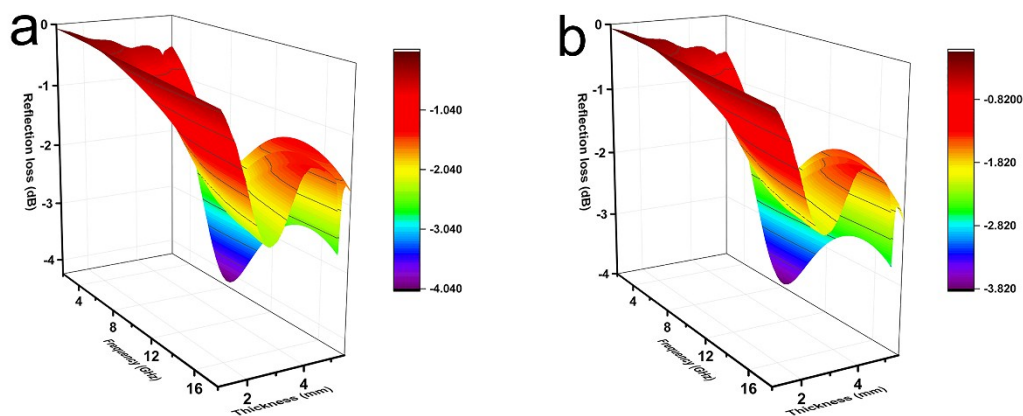

**Fig. S8** Three-dimensional representation of RL values for the commercial carbonyl iron powder (a) and after treatment with 1 M  $\text{NH}_3\cdot\text{H}_2\text{O}$  for 6 h (b) (30 wt.%).
